## Correction

# Correction: Effects of RNA interference-mediated gene silencing of VEGF on the ultrafiltration failure in a rat model of peritoneal dialysis

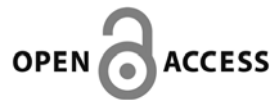

The authors of the original article “Effects of RNA interference-mediated gene silencing of VEGF on the ultrafiltration failure in a rat model of peritoneal dialysis” (*Bioscience Reports* (2017) 37, <https://doi.org/10.1042/BSR20170342>) have realised that the vector-4 group image of Figure 3 had been mistakenly placed into the PD4 group image of their immunohistochemistry experiment.

The correct Figure 3 is presented below.

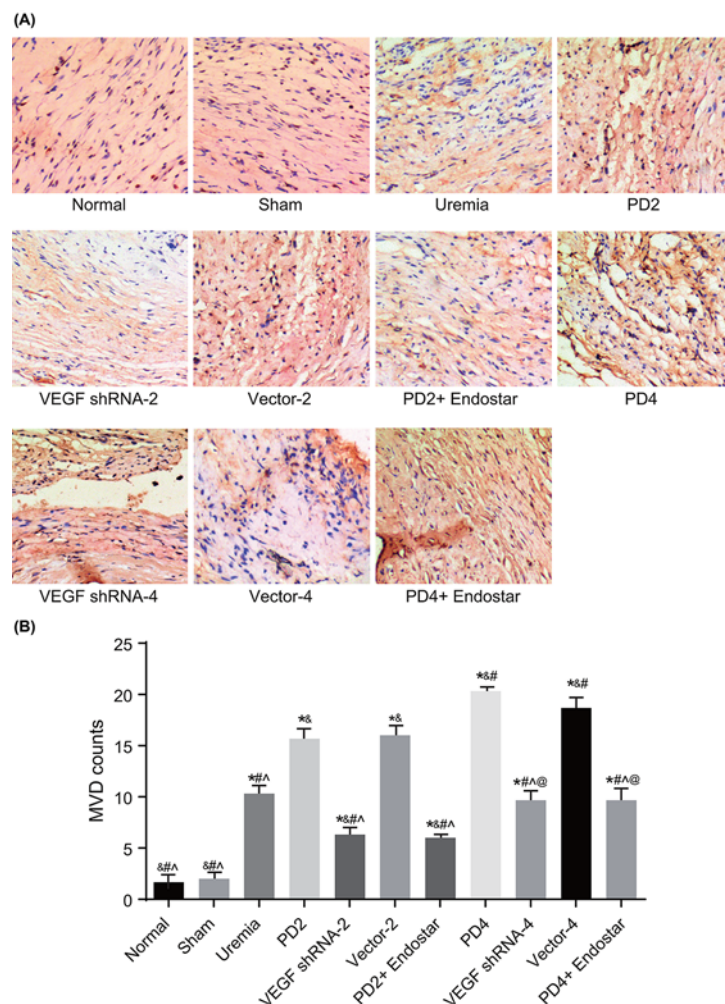

**Figure 3.** The number of new blood capillaries measured by immunohistochemistry in the 11 groups (n=3) (A) Images of stained new blood capillaries measured by immunohistochemistry; (B) comparison of the number of new blood capillaries amongst the 11 groups; \*, P<0.05 compared with the normal group; #, P<0.05 compared with the uremia group; ^, P<0.05 compared with the PD2 group; @, P<0.05 compared with the VEGF shRNA-2 group.

Version of Record published:  
14 May 2020

The authors would like to express their apologies for any inconvenience caused to the readers of their published article by this error.
